# Supplementary material for: Reduced graphene oxide/platinum nanoparticles/nafion nanocomposite as a novel 2D electrochemical sensor for voltammetric determination of aliskiren
Source: Royal Society of Chemistry journal article supplement (doi:10.1039/c7nj00569e), 2017-01-01
Supplement: c7nj00569e1.pdf [file c7nj00569e1.pdf]

## Electronic Supplementary Information

### Reduced graphene oxide/platinum nanoparticles/nafion nanocomposite as a novel 2D electrochemical sensor for voltammetric determination of aliskiren

Ali Kemal Ateş<sup>ac</sup>, Engin Er<sup>\*a</sup>, Hüseyin Çelikkan<sup>b</sup>, Nevin Erk<sup>a</sup>

<sup>a</sup> Department of Analytical Chemistry, Faculty of Pharmacy, Ankara University, Ankara, Turkey

<sup>b</sup> Department of Chemistry, Faculty of Science, Gazi University, Ankara, Turkey

<sup>c</sup> Department of Analytical Chemistry, Faculty of Pharmacy, Dicle University, Diyarbakır, Turkey

\* Corresponding author; E-mail: eer@ankara.edu.tr, Tel: +90 312 203 3180

The electroactive surface area of developed sensor was calculated by CV in 1.0 mM K<sub>3</sub>Fe(CN)<sub>6</sub> as a probe redox system according to the Randles-Sevcik equation<sup>1</sup>;

$$I_p = 2.69 \times 10^5 ACn^{3/2}D^{1/2}\nu^{1/2} \quad (1S)$$

Where  $I_p$  is the peak current (A), A is the electroactive area (cm<sup>2</sup>), C is the molar concentration of the probe molecule, n is the number of transferred electron in the redox reaction, D is the diffusion coefficient of probe molecule (cm<sup>2</sup> s<sup>-1</sup>) and  $\nu$  is the scan rate (V s<sup>-1</sup>). The number of transferred electron (n) is 1 and diffusion constant (D) is 7.6×10<sup>-6</sup> cm<sup>2</sup> s<sup>-1</sup> for [Fe(CN)<sub>6</sub>]<sup>3-/4-</sup> redox probe system. From the slope of the linear plot of  $I_p$  vs.  $\nu$ , the electroactive surface areas of GCE and rGO/PtNPs/NFN/GCE were calculated to be 31.00 mm<sup>2</sup> and 40.0 mm<sup>2</sup>, respectively.

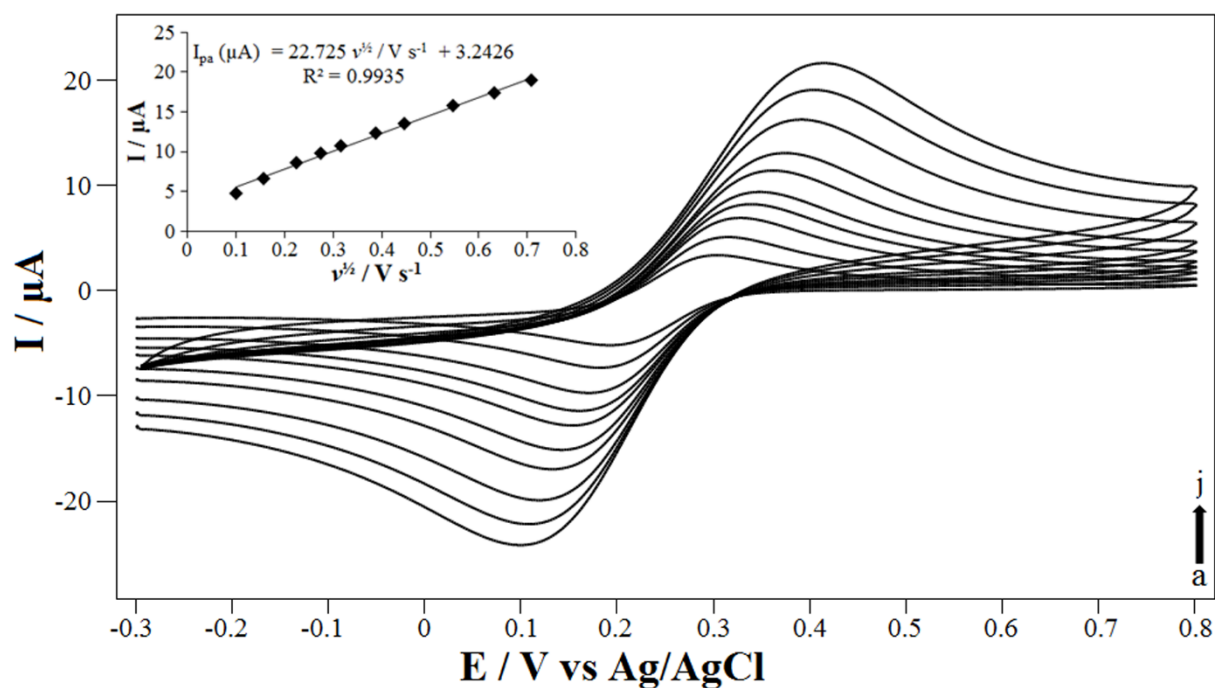

**Fig. S1** CVs of 1.0 mM  $\text{K}_3\text{Fe}(\text{CN})_6$  in 0.1 M  $\text{KNO}_3$  at various scan rates (a-j) (10, 25, 50, 75, 100, 150, 200, 300, 400 and 500  $\text{mV s}^{-1}$ ) on GCE (Inset: the slope of  $I_{pa}$  vs.  $v^{1/2}$  for 1.0 mM  $\text{K}_3\text{Fe}(\text{CN})_6$  on GCE).

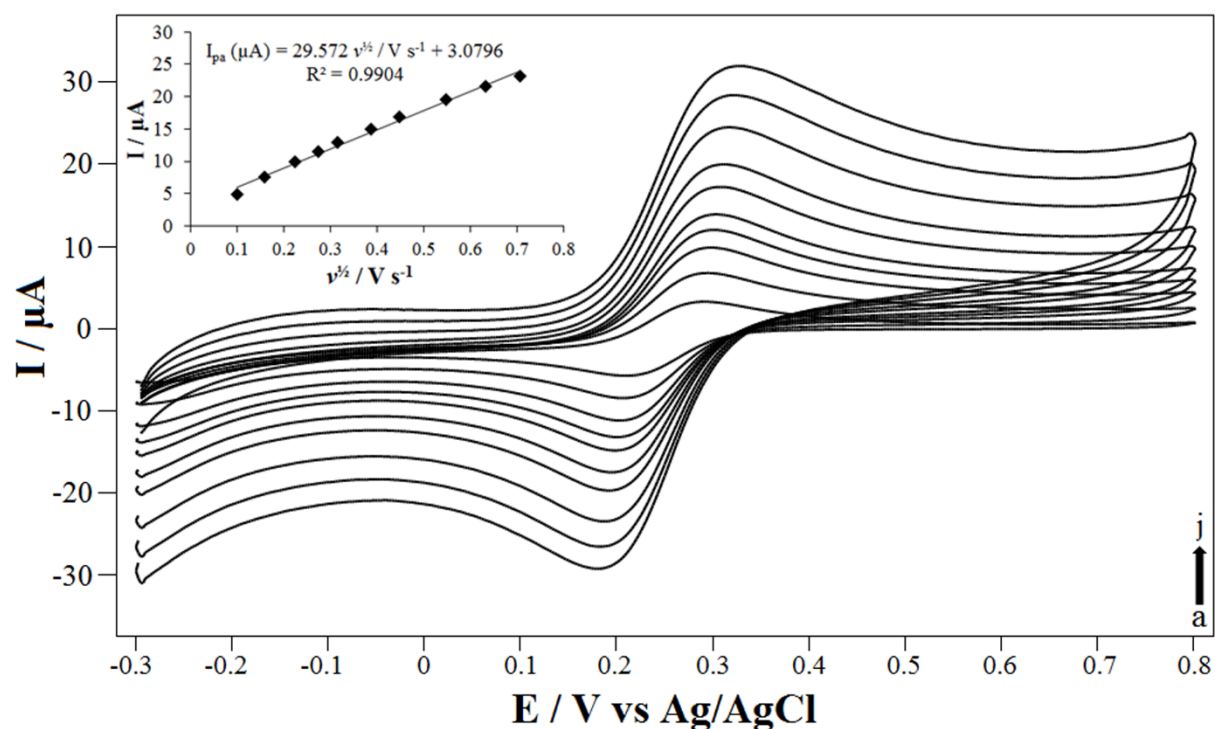

**Fig. S2** CVs of 1.0 mM  $\text{K}_3\text{Fe}(\text{CN})_6$  in 0.1 M  $\text{KNO}_3$  at various scan rates (a-j) (10, 25, 50, 75, 100, 150, 200, 300, 400 and 500  $\text{mV s}^{-1}$ ) on rGO/PtNPs/NFN/GCE (Inset: the slope of  $I_{pa}$  vs.  $v^{1/2}$  for 1.0 mM  $\text{K}_3\text{Fe}(\text{CN})_6$  on rGO/PtNPs/NFN/GCE).

The heterogeneous electron transfer rate constant ( $k^o$ ) value for rGO/PtNPs/NFN/GCE was estimated by CV using the Nicholson method<sup>2</sup>, which is applicable for reversible electrode reaction. According to the following equation developed by Nicholson,

$$\psi = k^o \left[ \frac{\pi D n \nu F}{RT} \right]^{-1/2} \quad (25)$$

Where  $\psi$  is a kinetic parameter,  $D$  is the diffusion coefficient of  $[\text{Fe}(\text{CN})_6]^{3-/4-}$  probe molecule ( $D=7.6 \times 10^{-6} \text{ cm}^2 \text{ s}^{-1}$  in supporting electrolyte solution),  $n$  is the number of transferred electron in the redox reaction,  $\nu$  is the scan rate ( $\text{V s}^{-1}$ ), and other symbols ( $F$ ,  $R$  and  $T$ ) are their usual meaning.  $k^o$  value was calculated as  $6.84 \times 10^{-3}$  using the slope of peak potential separation vs. scan rates ( $\Delta E_p - \nu$ ) in 1.0 mM  $[\text{Fe}(\text{CN})_6]^{3-/4-}$  redox solution.

## References

1. A.J. Bard, L.R. Faulkner, *Electrochemical Methods: Fundamentals and Applications*, 2<sup>nd</sup> edition, John Wiley & Sons, New York, USA, 2001.
2. R.S. Nicholson, Theory and application of cyclic voltammetry for measurement of electrode reaction kinetics, *Anal. Chem.*, 1965, 37, 1351–1355.
